# Supplementary material for: Engineering a “nanonet”-reinforced polymer electrolyte for long-life Li–O2batteries
Source: Royal Society of Chemistry journal article supplement (doi:10.1039/c9ta08778h), 2019-01-01
Supplement: c9ta08778h1.pdf [file c9ta08778h1.pdf]

## Supporting Information

### Engineering “Nanonet”-Reinforced Polymer Electrolyte for Long-Life Li-O<sub>2</sub> Batteries

Changtai Zhao,<sup>a</sup> Jianneng Liang,<sup>a</sup> Yang Zhao,<sup>a</sup> Jing Luo,<sup>a</sup> Qian Sun,<sup>a</sup> Yulong Liu,<sup>a</sup> Xiaoting Lin,<sup>a</sup> Xiaofei Yang,<sup>a</sup> Huan Huang,<sup>c</sup> Li Zhang,<sup>b</sup> Shangqian Zhao,<sup>b</sup> Shigang Lu,<sup>b</sup> and Xueliang Sun<sup>a,\*</sup>

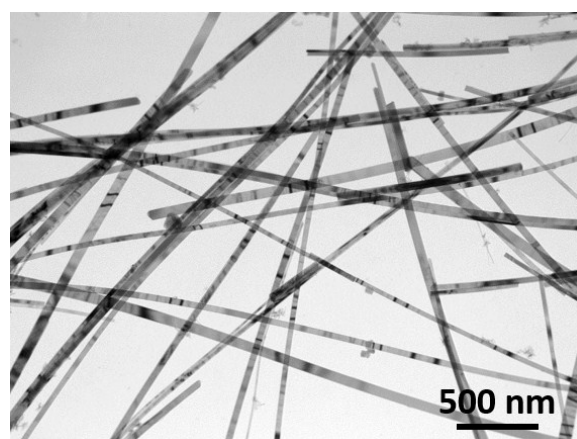

**Figure S1.** TEM image of MnOOH nanowires.

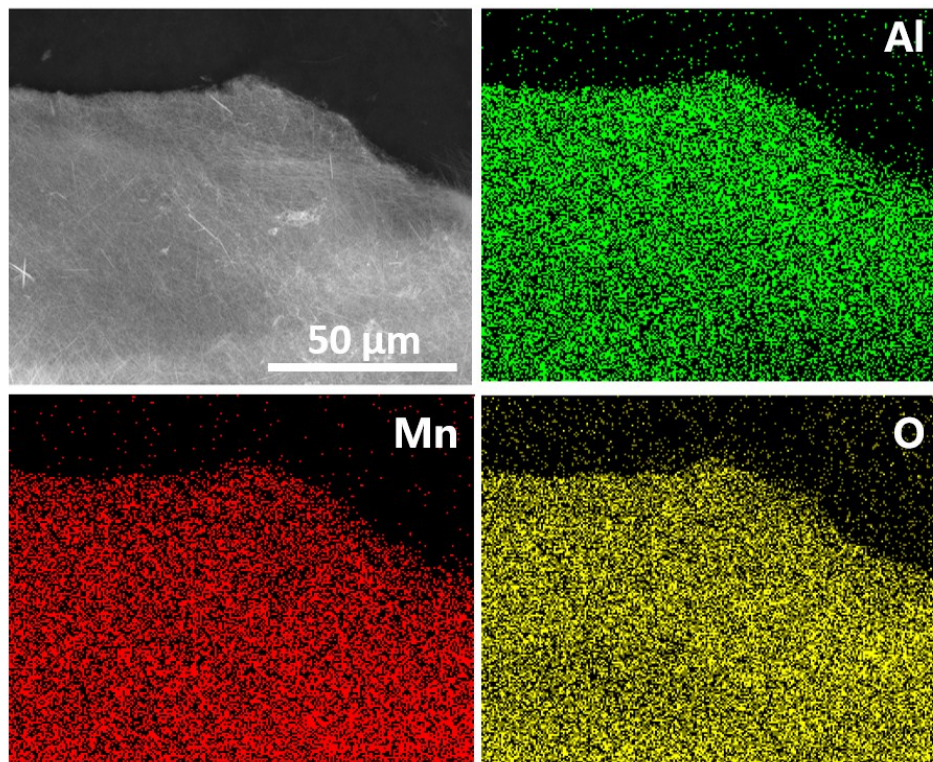

**Figure S2.** SEM image of the as-made MnOOH@Al<sub>2</sub>O<sub>3</sub> film and the corresponding element mapping images.

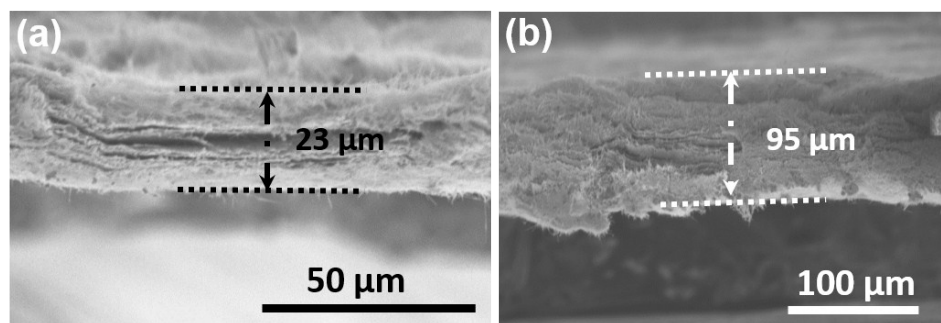

**Figure S3.** SEM images of MnOOH films with different thicknesses.

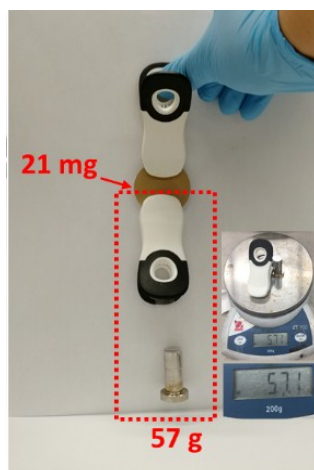

**Figure S4.** Digital photograph showing the mechanical property of MnOOH@Al<sub>2</sub>O<sub>3</sub> film.

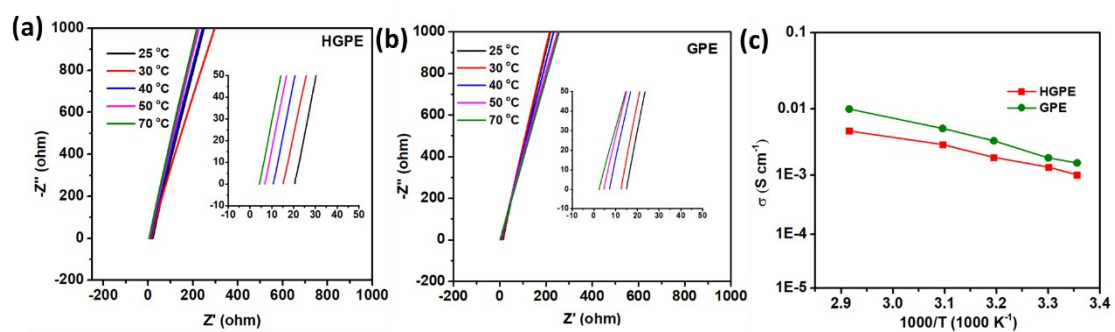

**Figure S5.** Nyquist plots for testing the ionic conductivity of (a) HGPE and (b) GPE, and the corresponding (c) ionic conductivity at different temperature.

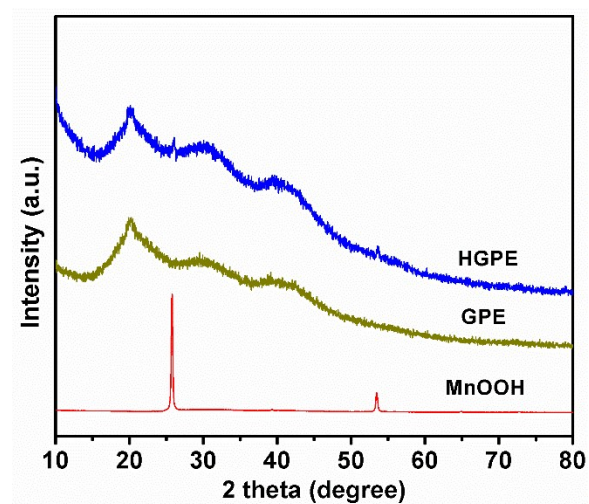

**Figure S6.** XRD patterns of the as-made MnOOH nanowires, GPE and HGPE.

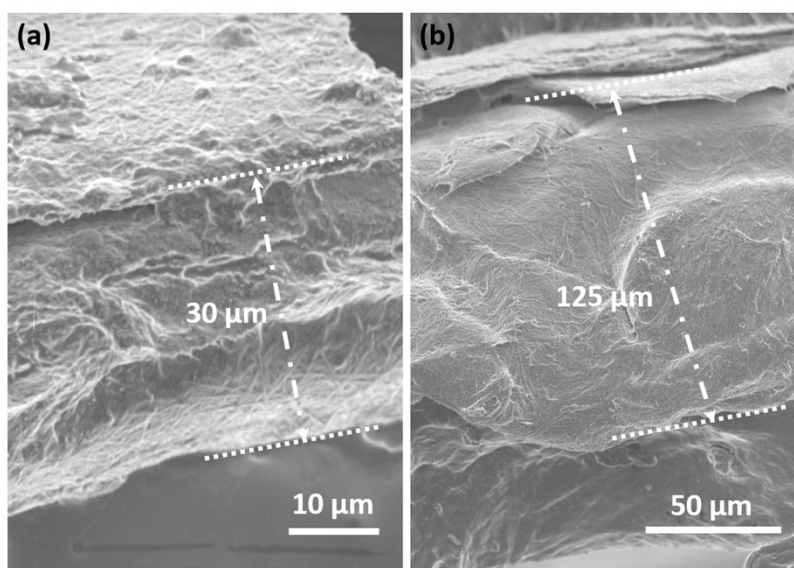

**Figure S7.** Cross-section SEM images of the HGPE with different thicknesses.

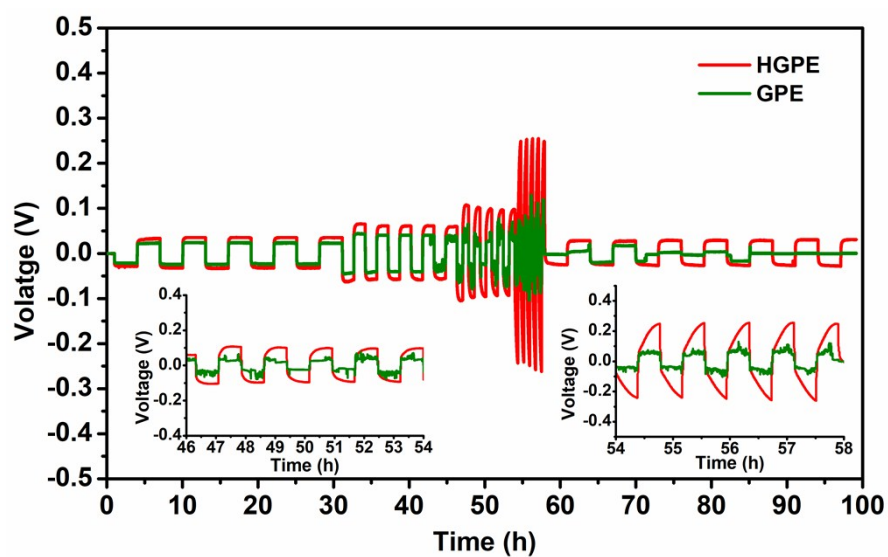

**Figure S8.** Discharge/charge curves of Li symmetric cells with HGPE and GPE at different current densities of 0.1, 0.2, 0.4, and 0.8 mA cm<sup>-2</sup> with a limited capacity of 0.3 mA h cm<sup>-2</sup>.

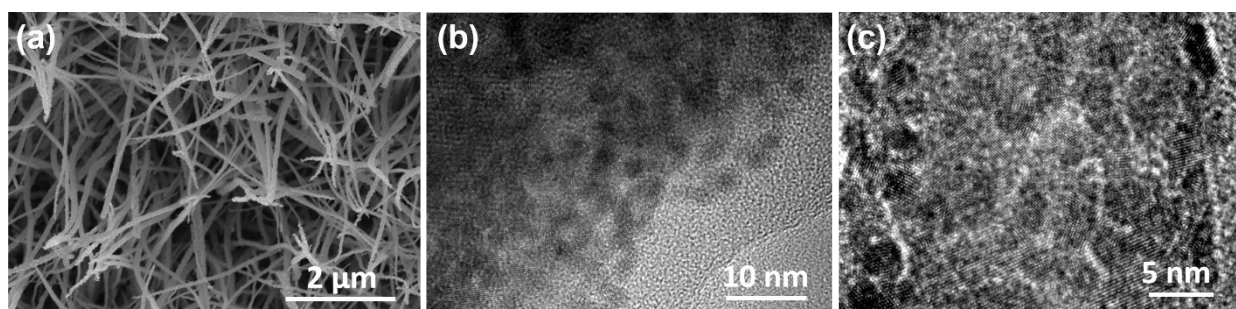

**Figure S9.** (a) SEM, (b) TEM and (c) HRTEM images of Ni foam@Co<sub>3</sub>O<sub>4</sub>-RuO<sub>2</sub>.

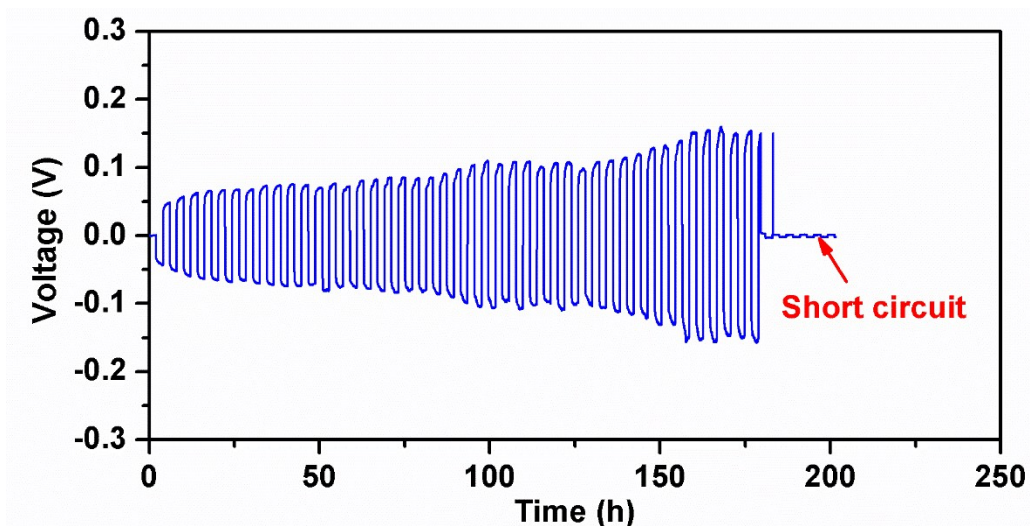

**Figure S10.** The cycling stability of Li metal symmetric cells with GPE without  $\text{LiNO}_3$  additive at a current density of  $0.1 \text{ mA cm}^{-2}$  with a limited capacity of  $0.2 \text{ mA h cm}^{-2}$ .

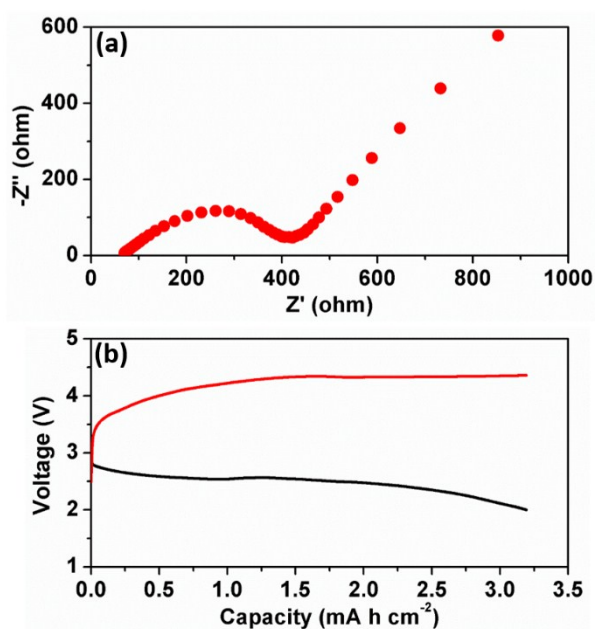

**Figure S11.** (a) Nyquist plot and (b) initial discharge/charge profiles of the  $\text{Li-O}_2$  battery with HGPE and high-efficiency  $\text{Ni foam@Co}_3\text{O}_4\text{-RuO}_2$  air electrode at a current density of  $0.1 \text{ mA cm}^{-2}$ .
